# Supplementary material for: FliZ Is a Global Regulatory Protein Affecting the Expression of Flagellar and Virulence Genes in Individual Xenorhabdus nematophila Bacterial Cells
Source: PLOS journal article supplement (doi:10.1371/journal.pgen.1003915), 2013-10-31

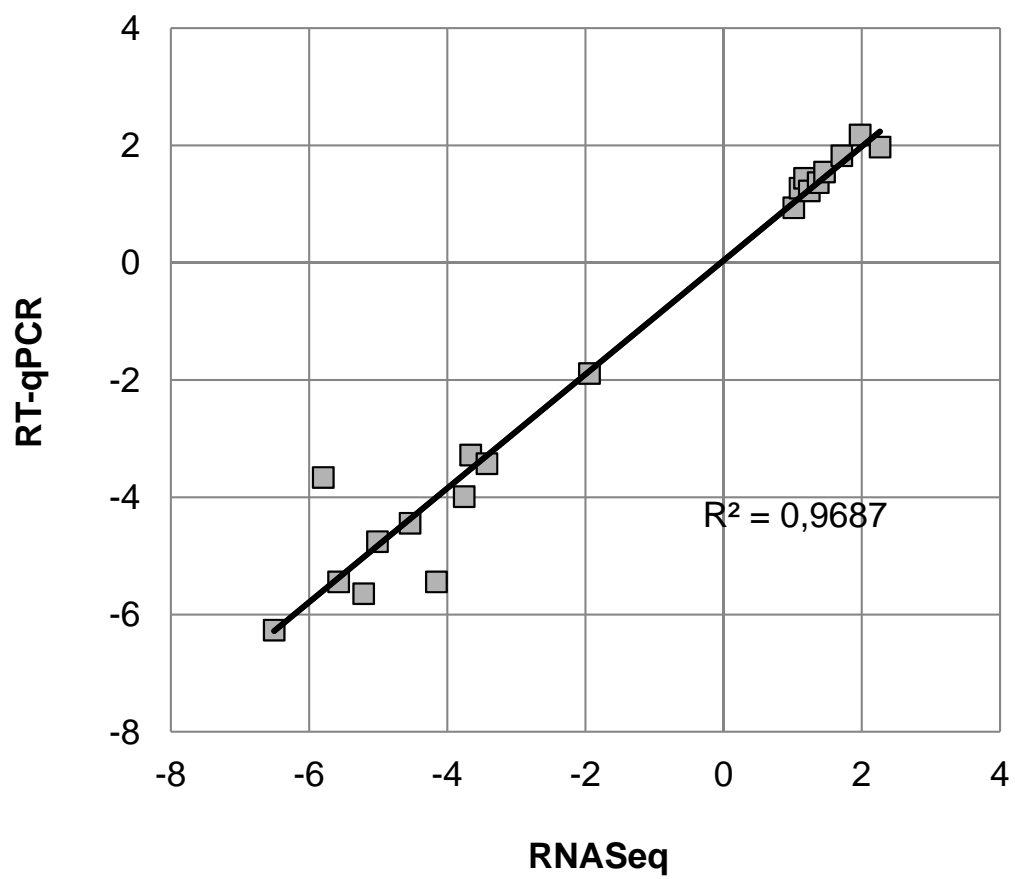

Supplement: S1 (10.1371/journal.pgen.1003915.s001) [file journal.pgen.1003915.s001]
